# Supplementary material for: Preparation and characterization of a highly dispersed Ru/CeZrO2 catalyst for CO2 methanation with improved activity
Source: Royal Society of Chemistry journal article supplement (doi:10.1039/d4cy01332h), 2025-01-01
Supplement: d4cy01332h1.pdf [file d4cy01332h1.pdf]

## Supplementary Materials

# **Preparation and Characterization of Highly Dispersed Ru/CeZrO<sub>2</sub> Catalyst for CO<sub>2</sub> Methanation with Improved Activity**

*Weiwen Yan<sup>a</sup>, Menghui Liu<sup>a</sup>, Mengxing Li<sup>a</sup>, Liangkai Xu<sup>a</sup>, and Chang-jun Liu<sup>a,b\*</sup>*

*<sup>a</sup>School of Chemical Engineering and Technology, Tianjin University, Tianjin, China.*

*<sup>b</sup>Collaborative Innovation Center of Chemical Science & Engineering, Tianjin*

*University, Tianjin, China.*

*\*Corresponding Author: Chang-jun Liu    E-mail: cjl@tju.edu.cn*

This document contains the effect of Ce/Zr ratio on the activity (Figure S1), volumetric CO chemisorption of (a) Ru/CeZrO<sub>2</sub>-C and (b) Ru/CeZrO<sub>2</sub>-P (Figure S2), EDX mappings of (1) Ce and (2) Zr on (a) Ru/CeZrO<sub>2</sub>-P, (b) Ru/CeZrO<sub>2</sub>-C, (c) Ru/CeZrO<sub>2</sub>-P-spent, and (d) Ru/CeZrO<sub>2</sub>-C-spent (Figure S3), EPR spectra of Ru/CeZrO<sub>2</sub>-P and Ru/CeZrO<sub>2</sub>-C (Figure S4), the XPS spectra of Ru 3p over Ru/CeZrO<sub>2</sub>-P catalyst after the 100-h stability test (Figure S5), Quasi *in-situ* XPS spectra of O 1s on (a) Ru/CeZrO<sub>2</sub>-P (b) Ru/CeZrO<sub>2</sub>-C (Figure S6), comparison with the reported Ru catalysts for CO<sub>2</sub> methanation (Table S1), Quasi *in-situ* XPS results of the concentration of Ce<sup>3+</sup> (%) (Table S2), assignments of the bands of *in-situ* DRIFT experiments on the catalysts (Table S3).

## Supplementary Figures

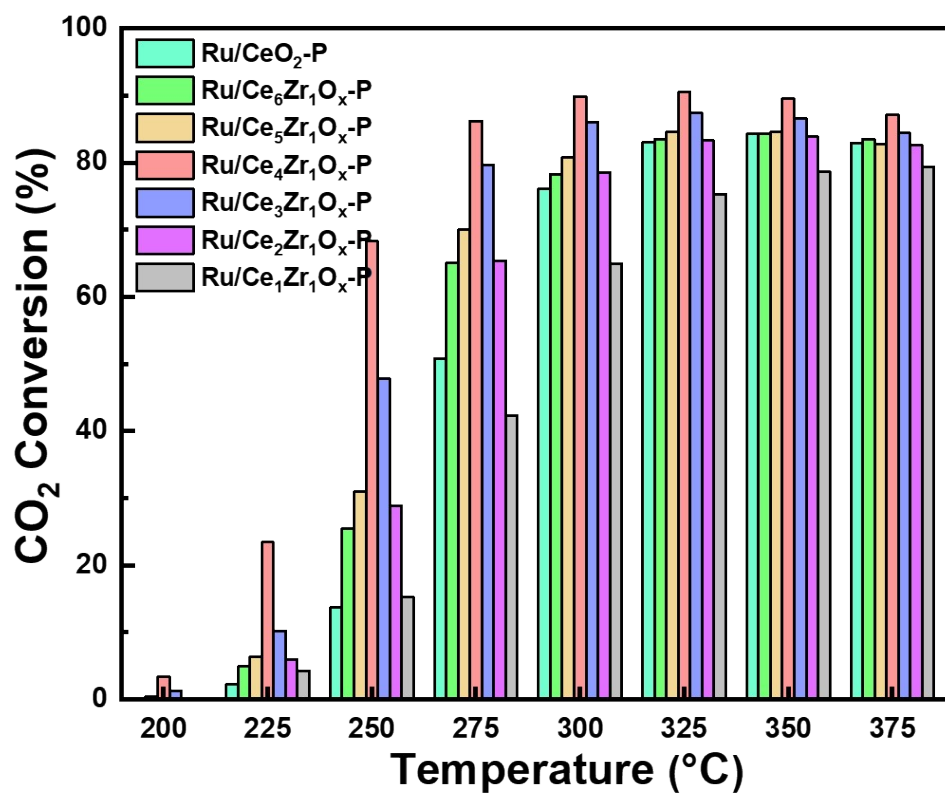

Figure S1. The effect of Ce/Zr molar ratio on CO<sub>2</sub> methanation activity.

The dispersion of Ru was calculated based on the volume of chemisorbed CO by using the following equation:

$$D\% = \frac{V_{ad} \times M_{\text{metal}} \times SF}{p \times V_m \times d_r}$$

where  $D$  denotes the dispersion of Ru particles;  $V_{ad}$  (ml g<sup>-1</sup>) is volume of chemisorbed CO at STP;  $M_{\text{metal}}$  is the molecular weight of Ru (101.07 g mol<sup>-1</sup>);  $SF$  is the stoichiometric factor (Ru:CO molar ratio in the chemisorption experiment) which is taken as 1;  $p$  is the weight fraction of Ru in the catalysts as determined by ICP-OES;  $V_m$  is molar volume of CO (22.4 L mol<sup>-1</sup>) at standard temperature and pressure (STP);  $d_r$  is the reduction degree of Ru, determined by quasi *in-situ* XPS analysis.

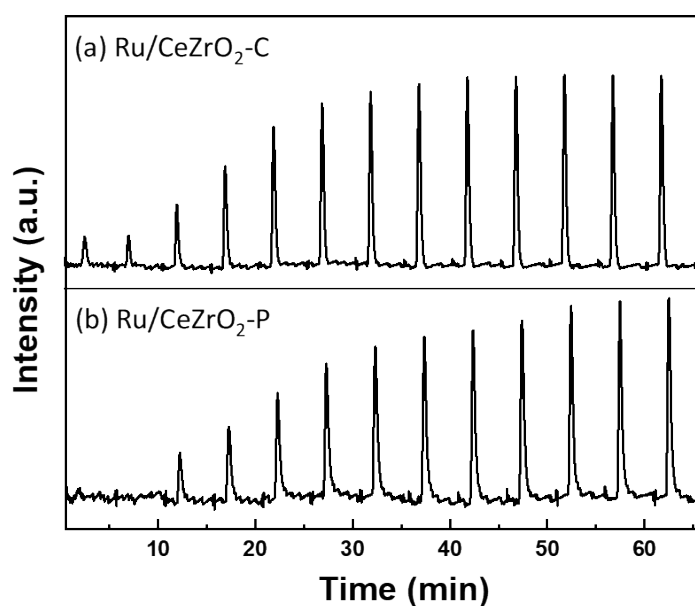

Figure S2. Volumetric CO chemisorption of (a) Ru/CeZrO<sub>2</sub>-C and (b) Ru/CeZrO<sub>2</sub>-P. (The number of pulses needed for Ru/CeZrO<sub>2</sub>-P and Ru/CeZrO<sub>2</sub>-C are approximately 13. The peak intensity rises steadily in the first pulses of the CO adsorption period until saturation, when it stabilizes at a constant level. When the peak intensity stays

constant for three times, the pulse experiment shuts down automatically.)

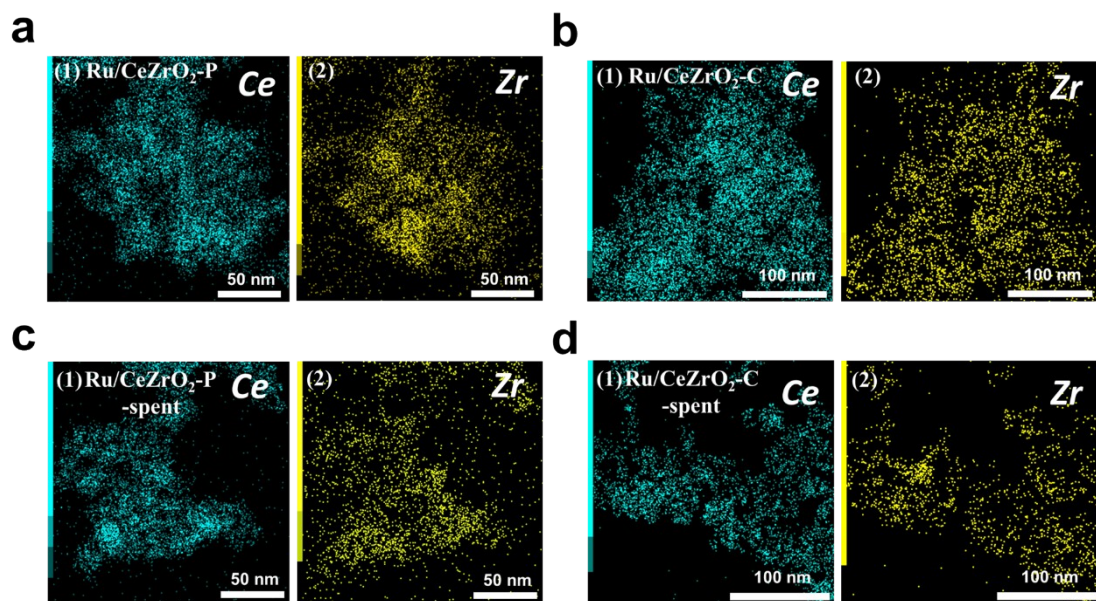

Figure S3. EDX mappings of (1) Ce and (2) Zr on (a) Ru/CeZrO<sub>2</sub>-P, (b) Ru/CeZrO<sub>2</sub>-C, (c) Ru/CeZrO<sub>2</sub>-P-spent, and (d) Ru/CeZrO<sub>2</sub>-C-spent.

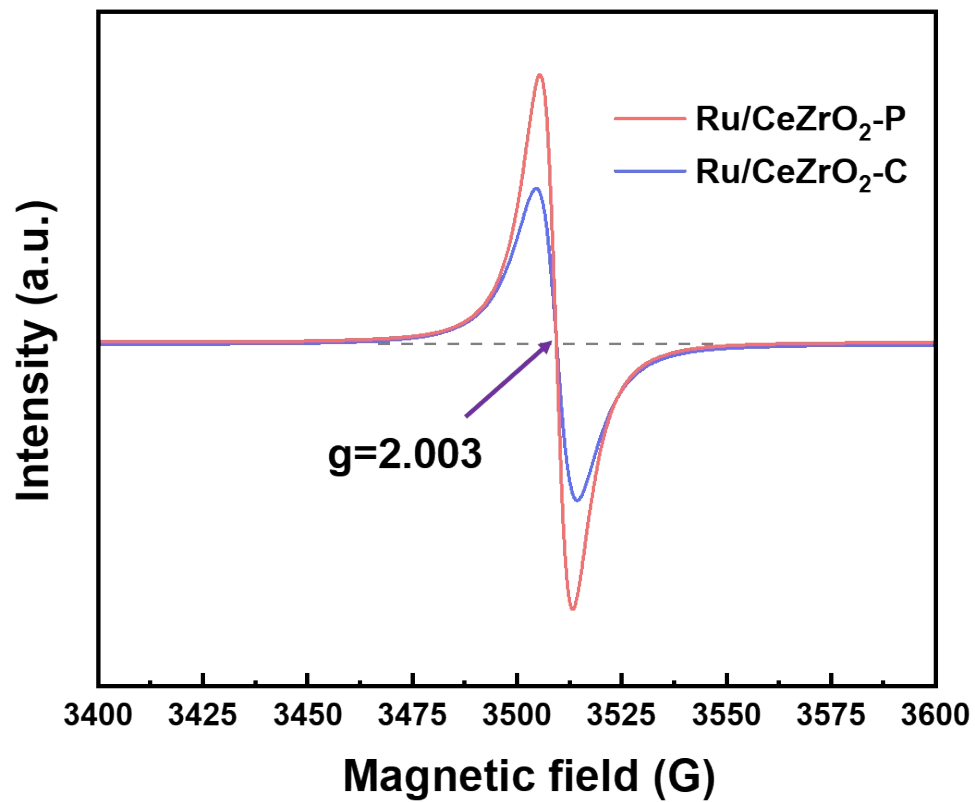

Figure S4. EPR spectra of Ru/CeZrO<sub>2</sub>-P and Ru/CeZrO<sub>2</sub>-C.

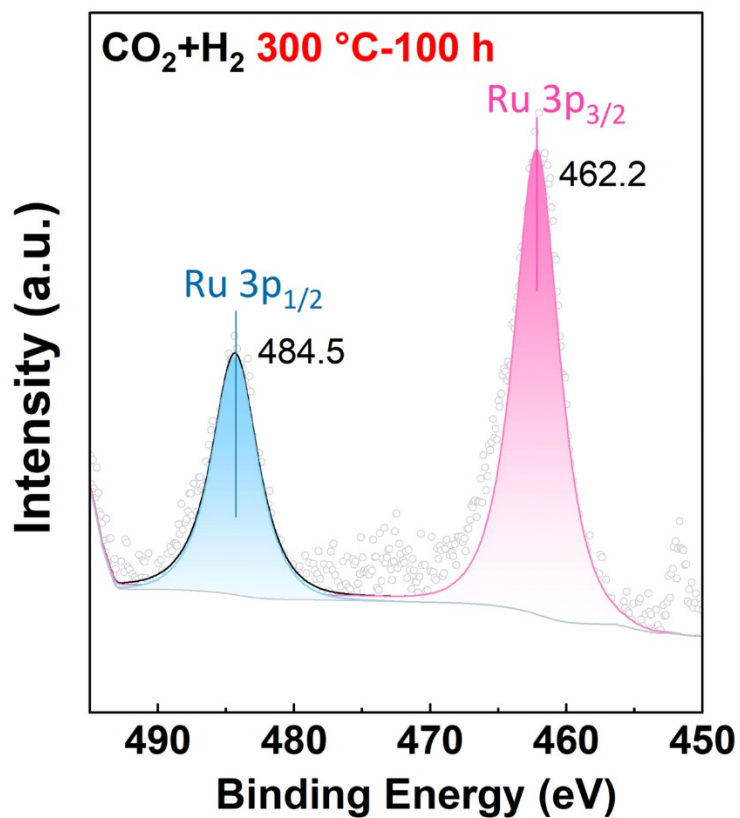

Figure S5. The XPS spectra of Ru 3p over Ru/CeZrO<sub>2</sub>-P catalyst after 100-hr stability test.



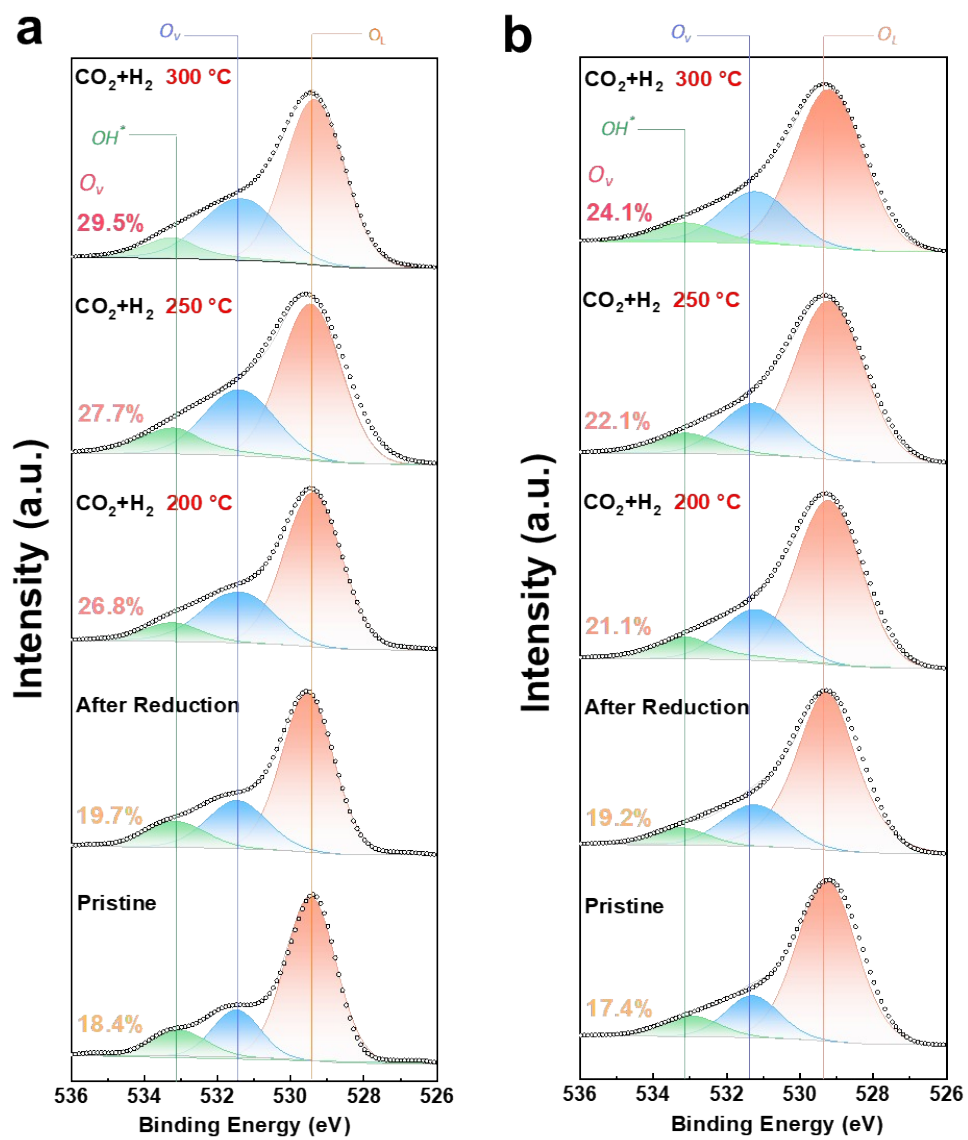

Figure S6. Quasi *in-situ* XPS spectra of O 1s on (a) Ru/CeZrO<sub>2</sub>-P (b) Ru/CeZrO<sub>2</sub>-C.

## Supplementary Tables

Table S1. Comparison with the reported Ru catalysts for CO<sub>2</sub> methanation.

| Catalyst                                  | Temperature (°C) | Pressure (atm) | GHSV (cm <sup>3</sup> h <sup>-1</sup> g <sub>cat</sub> <sup>-1</sup> ) | CO <sub>2</sub> Conversion (%) | CH <sub>4</sub> formation rate (μmol <sub>CH<sub>4</sub></sub> g <sub>cat</sub> <sup>-1</sup> s <sup>-1</sup> ) | Ref.      |
|-------------------------------------------|------------------|----------------|------------------------------------------------------------------------|--------------------------------|-----------------------------------------------------------------------------------------------------------------|-----------|
| RT001                                     | 300              | 1              | 5600                                                                   | 73.0                           | 5.1                                                                                                             | S1        |
| Ru/TiO <sub>2</sub> (8-5)                 | 300              | 1              | 24,000                                                                 | 41.5                           | 12.3                                                                                                            | S2        |
| Ru/R-TiO <sub>2</sub> -air-H <sub>2</sub> | 300              | 1              | 12,000                                                                 | 89.2                           | 19.9                                                                                                            | S3        |
| Ru/TiO <sub>2</sub> -600                  | 300              | 1              | 72,000                                                                 | 21.5                           | 28.8                                                                                                            | S4        |
| Ti350Ru450                                | 200              | 1              | 6000                                                                   | 12.6                           | 2.1                                                                                                             | S5        |
| Ru(1%)-TiO <sub>2</sub>                   | 300              | 1              | 400,000                                                                | 7.6                            | 73.9                                                                                                            | S6        |
| 1.9wt% Ru-Mo-O <sub>x</sub>               | 300              | 1              | 10,000                                                                 | 26.0                           | 1.0                                                                                                             | S7        |
| Ru/CeO <sub>2</sub> /r                    | 300              | 1              | 72,000                                                                 | 73.0                           | 65.2                                                                                                            | S8        |
| Ru/CeO <sub>2</sub>                       | 300              | 1              | 360                                                                    | 95.0                           | 1.0                                                                                                             | S9        |
| Ru/α-Al <sub>2</sub> O <sub>3</sub>       | 300              | 1              | 360                                                                    | 51.0                           | 0.5                                                                                                             | S9        |
| 3Ru/CeO <sub>2</sub>                      | 300              | 1              | 60,000                                                                 | 85.0                           | 65.5                                                                                                            | S10       |
| Ru/CeO <sub>2</sub> -P                    | 300              | 1              | 60,000                                                                 | 85.0                           | 100.2                                                                                                           | S11       |
| 2Ru/CeZr(Ac Ac)                           | 300              | 1              | 60,000                                                                 | 18.0                           | 13.4                                                                                                            | S12       |
| Ru/CeZrO <sub>2</sub> -P                  | 300              | 1              | 60,000                                                                 | 89.9                           | 107.0                                                                                                           | This work |

Table S2 Quasi *in-situ* XPS results of the concentration of Ce<sup>3+</sup> (%).

|                 | Ru/CeZrO <sub>2</sub> -P | Ru/CeZrO <sub>2</sub> -C |
|-----------------|--------------------------|--------------------------|
| Pristine        | 15.5                     | 12.4                     |
| After Reduction | 40.1                     | 16.9                     |
| 200 °C          | 47.5                     | 36.4                     |
| 250 °C          | 54.2                     | 42.9                     |
| 300 °C          | 58.6                     | 44.1                     |

Table S3. Assignments of the bands of *in-situ* DRIFT experiments on the catalysts.

| Wavenumber (cm <sup>-1</sup> )                                                                | Assignments         | Reference |
|-----------------------------------------------------------------------------------------------|---------------------|-----------|
| 2060 cm <sup>-1</sup>                                                                         | linear-CO*          | S3, S13   |
| 1610 cm <sup>-1</sup>                                                                         | m-HCOO*             | S14-S18   |
| 1595 cm <sup>-1</sup> , 1540 cm <sup>-1</sup> , 1390 cm <sup>-1</sup> , 1360 cm <sup>-1</sup> | b-HCOO*             |           |
| 1500 cm <sup>-1</sup> , 1440 cm <sup>-1</sup>                                                 | CO <sub>3</sub> *   | S11, S19  |
| 3015 cm <sup>-1</sup> , 1302 cm <sup>-1</sup>                                                 | CH <sub>4</sub> (g) | S7, S20   |

## References

- S1 Chai S, Men Y, Wang J, Liu S, Song Q, An W, Kolb G, *J. CO2 Util.* 2019, **33**, 242-252.
- S2 Zhou Z, Li J, You Z, *Appl. Surf. Sci.* 2022, **587**, 152856.
- S3 Zhou J, Gao Z, Xiang G, Zhai T, Zhao W, Liang X, Wang L, *Nat. Commun.* 2022, **13**(1), 327.
- S4 Zhao Z, Jiang Q, Wang Q, Wang M, Zuo J, Chen H, Kuang Q, Xie Z, *ACS Sustainable Chem. Eng.* 2021, **9**(42), 14288-14296.
- S5 Kim A, Sanchez C, Haye B, Boissière C, Sasse\* C, Debecker\* D P, *ACS Appl. Nano Mater.* 2019, **2**(5), 3220-3230.
- S6 Moon W K, Lee Z H, Hwangbo M, Docao S, Kim M G, Yoon K B, *J. Catal.* 2022, **413**, 221-238.
- S7 Xin H, Lin L, Li R, Li D, Song T, Mu R, Fu Q, Bao X, *J. Am. Chem. Soc.* 2022, **144**(11): 4874-4882.
- S8 Sakpal T, Lefferts L, *J. Catal.* 2018, **367**: 171-180.
- S9 Wang F, He S, Chen H, Wang B, Zheng L, Wei M, Evans D G, Duan X, *J. Am. Chem. Soc.* 2016, **138**(19): 6298-6305.
- S10 López-Rodríguez S, Davó-Quñonero A, Bailón-García E, Lozano-Castelló D, Bueno-López A, *Mol. Catal.* 2021, **515**, 111911.
- S11 Li M, Yan W, Liu M, Liu C, Improved activity of Ru/CeO<sub>2</sub> catalyst for CO<sub>2</sub> methanation by enhanced electronic metal-support interaction, *Energy Fuels*

<https://doi.org/10.1021/acs.energyfuels.4c04980>.

- S12 Renda, S.; Ricca, A.; Palma, V., *Appl. Energy*. 2020, **279**, 115767.
- S13 Li J, Liu Z, Cullen D A, Hu W, Huang J, Yao L, Peng Z, Liao P, Wang R, *ACS Catal.* 2019, **9**(12), 11088-11103.
- S14 Jia X, Zhang X, Rui N, Hu X, Liu C, *Appl Catal, B*. 2019, **244**, 159-169.
- S15 Dai Y, Zou R, Ba T, Zhang J, Liu C, *J. CO2 Util.* 2021, **51**, 101647.
- S16 Winter L R, Chen R, Chen X, Chang K, Liu Z, Senanayake S D, Ebrahim A M, Chen J G, *Appl Catal, B*. 2019, **245**, 360-366.
- S17 Aldana P A U, Ocampo F, Kobl K, Louis B, Thibault-Starzyk F, Daturi M, Bazin P, Thomas S, Roger A.C, *Catal. Today*. 2013, **215**, 201-207.
- S18 El-Nagar G A, Yang F, Stojkovicj S, Mebs S, Gupta S, Ahmet L Y, Dau H, Mayer M T, *ACS Catal.* 2022, **12**(24), 15576-15589.
- S19 Pathak A K, Maity D K, *J. Phys. Chem.* 2009, **113**(48), 13443-13447.
- S20 Liu Z, Zhang F, Rui N, Li X, Lin L, Betancourt L E, Su D, Xu W, Cen J, Attenkofer K, Idriss H, Rodriguez\* J A, Senanayake\* S D, *ACS Catal.* 2019, **9**(4), 3349-3359.
